# Supplementary material for: Electron detachment dynamics of Cu−(H2O)n (n = 1–3): a direct ab initio MD study
Source: Royal Society of Chemistry journal article supplement (doi:10.1039/c2ra20907a), 2012-01-01
Supplement: c2ra20907a.pdf [file c2ra20907a.pdf]

## SUPPORTING INFORMATION

### Electron Detachment Dynamics of $\text{Cu}^-(\text{H}_2\text{O})_n$ ( $n=1-3$ ):

#### A Direct Ab-initio MD study

Hiroto TACHIKAWA\*

*Division of Materials Chemistry, Graduate School of Engineering,*

*Hokkaido University, Sapporo 060-8628, JAPAN*

#### 1. Energy diagram of the system ( $n=1$ )

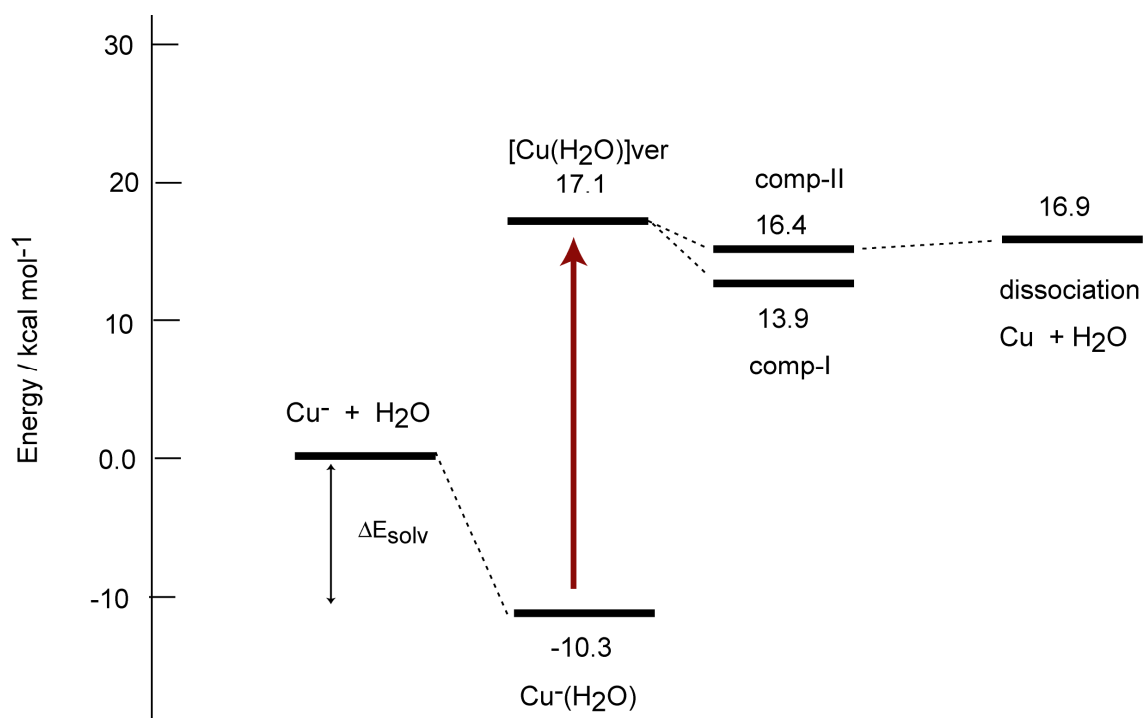

Figure S1. Energy diagram of  $\text{Cu}(\text{H}_2\text{O})$  system calculated at the MP2/6-311++G(2d,2p) level. Values indicate the relative energies in kcal/mol.

## 2. Electron capture dynamics of $\text{Cu}(\text{H}_2\text{O})_n$ ( $n=1$ ).

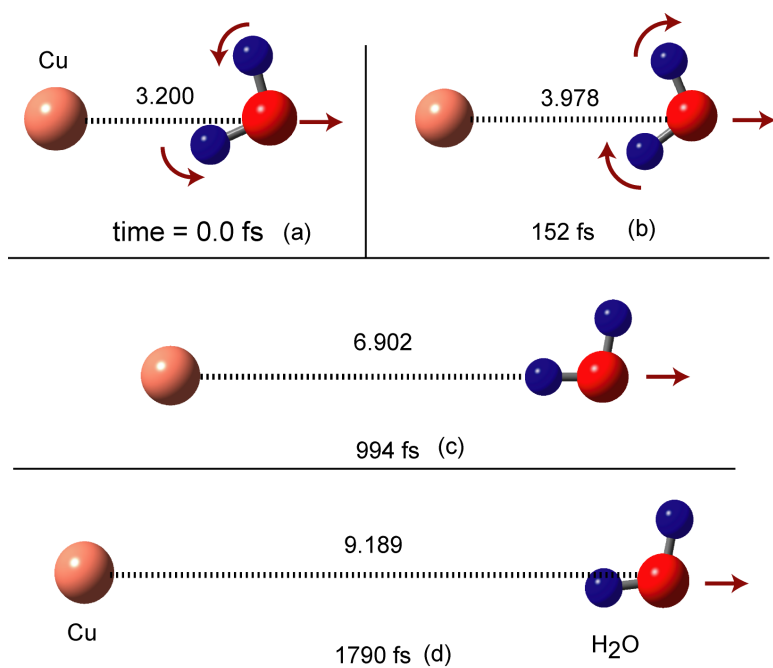

Figure S2. Snapshots of  $\text{Cu}(\text{H}_2\text{O})$  after the electron detachment obtained at the MP2/6-311++G(2d,2p) level. Values indicate bond distances in Å.

3. Electron capture dynamics of  $\text{Cu}(\text{H}_2\text{O})_n$  ( $n=2$ ).

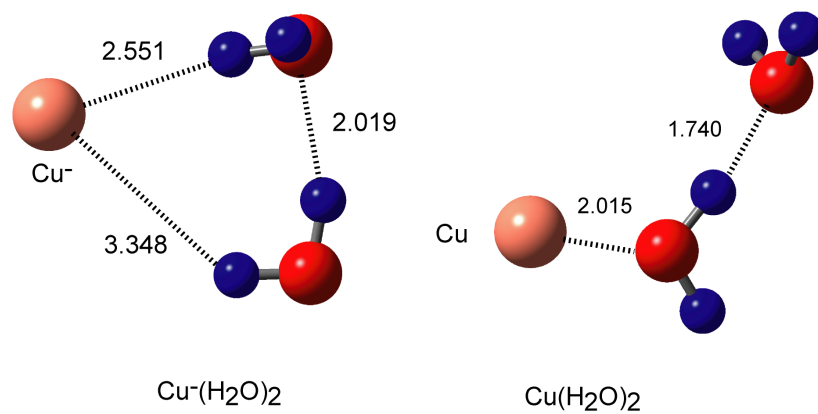

Figure S3. Optimized structures of  $\text{Cu}-(\text{H}_2\text{O})_n$  and  $\text{Cu}(\text{H}_2\text{O})_n$  ( $n=2$ ) obtained at the MP2/6-311++G(2d,2p) level. Values indicate bond distances in Å.

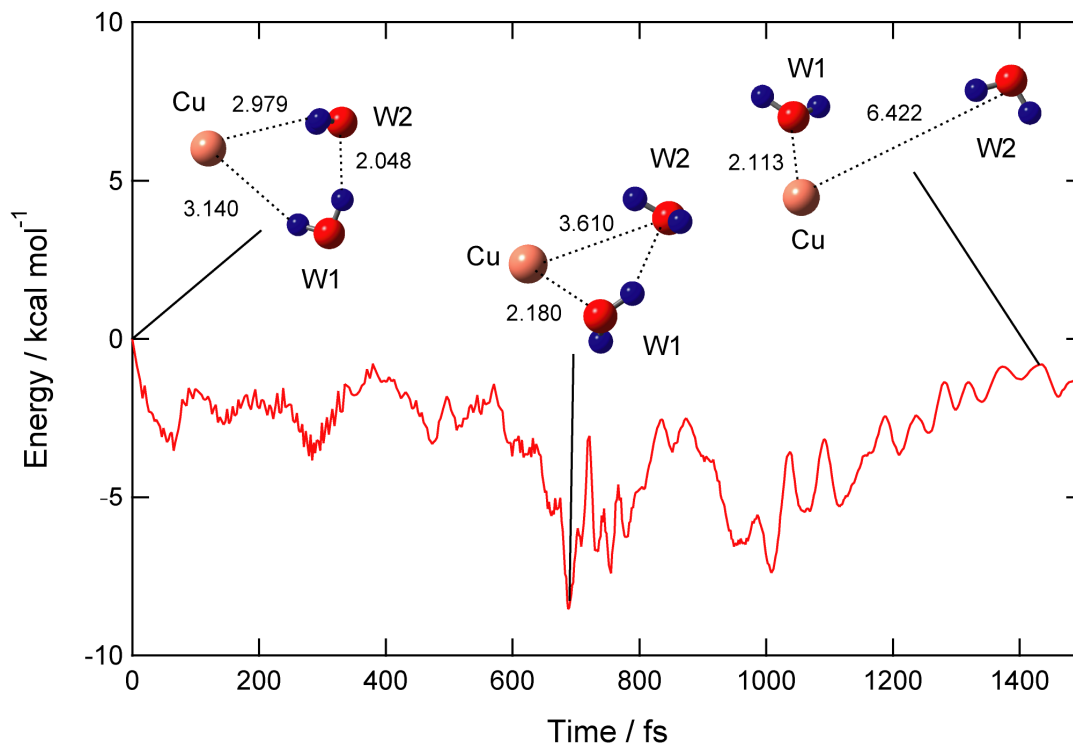

Figure S4. Time evolution of potential energy of the Cu(H<sub>2</sub>O)<sub>n</sub> (*n*=2) system and snapshots for electron detachment of Cu<sup>-</sup>(H<sub>2</sub>O)<sub>2</sub> obtained by direct ab-initio MD calculation at the MP2/6-311++G(2d,2p) level. Values indicate bond distances between molecules in Å. Partial complex channel (products are CuH<sub>2</sub>O + H<sub>2</sub>O) was obtained as product channel.

4. Optimized structure of  $\text{Cu}^-(\text{H}_2\text{O})_n$  ( $n=3$ ).

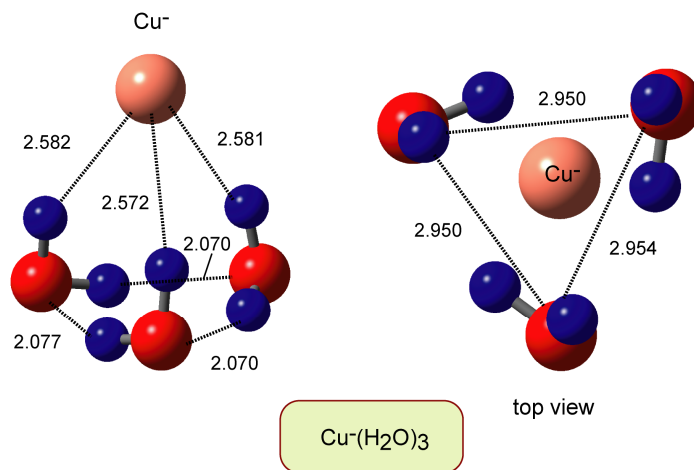

Figure S5. Optimized structures of  $\text{Cu}^-(\text{H}_2\text{O})_n$  ( $n=3$ ) obtained at the MP2/6-311++ G(2d,2p) level. Values indicate bond distances in Å.

4. Optimized structure of  $\text{Cu}^-(\text{H}_2\text{O})_n$  ( $n=6$ ).

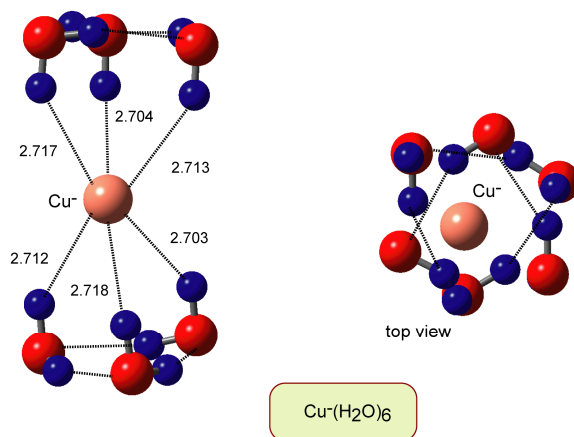

Figure S6. Optimized structures of  $\text{Cu}^-(\text{H}_2\text{O})_n$  ( $n=6$ ) obtained at the MP2/6-311++ G(2d,2p) level. Values indicate bond distances in Å.

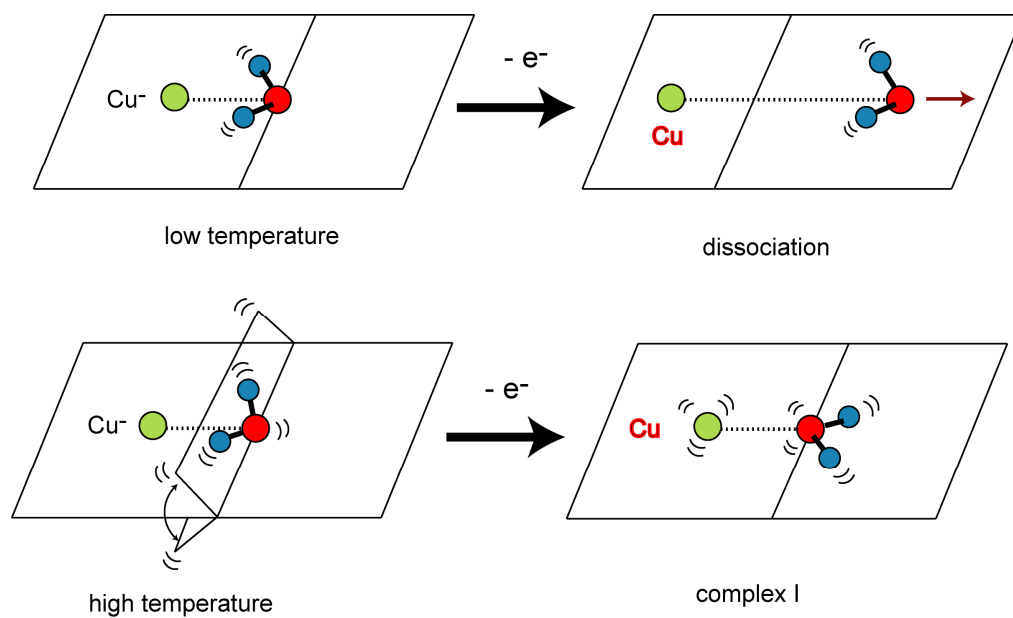

Figure S7. Model of temperature effect on the reaction channels.

Table S1. Optimized geometrical parameters of  $\text{Cu}^-(\text{H}_2\text{O})$  and  $\text{CuH}_2\text{O}$  calculated at the MP2, MP4SDQ, CCSD and QCISD/6-311++G(2d,2p) and QCISD/6-311++G(3df,3pd) levels of theory. Bond lengths and angles are in Å and in degrees, respectively.

|                                            |              | MP2          | MP4SDQ | CCSD  | QCISD | QCISD <sup>a</sup> |       |
|--------------------------------------------|--------------|--------------|--------|-------|-------|--------------------|-------|
| $\text{Cu}^-(\text{H}_2\text{O})$          | $\text{R}_1$ | 3.404        | 3.485  | 3.603 | 3.603 | 3.508              |       |
|                                            | $\text{C}_s$ | $\text{R}_2$ | 0.961  | 0.958 | 0.958 | 0.958              | 0.959 |
|                                            |              | $\text{R}_3$ | 0.974  | 0.969 | 0.966 | 0.966              | 0.968 |
|                                            | $\theta_1$   | 99.4         | 100.2  | 100.8 | 100.8 | 100.1              |       |
|                                            | $\theta_2$   | 75.2         | 75.6   | 75.3  | 75.3  | 74.4               |       |
| $\text{Cu}(\text{H}_2\text{O})(\text{I})$  | $\text{R}_1$ | 2.200        | 2.179  | 2.260 | 2.164 | 2.158              |       |
|                                            | $\text{C}_s$ | $\text{R}_2$ | 0.962  | 0.960 | 0.959 | 0.960              | 0.961 |
|                                            |              | $\theta_1$   | 105.2  | 105.5 | 105.4 | 105.6              | 105.3 |
|                                            |              | $\phi$       | 54.5   | 54.0  | 53.6  | 55.4               | 43.2  |
| $\text{Cu}(\text{H}_2\text{O})(\text{II})$ | $\text{R}_1$ | 3.965        | 3.956  | 4.137 | 4.019 | 3.908              |       |
|                                            | $\text{R}_2$ | 0.960        | 0.958  | 0.957 | 0.958 | 0.959              |       |
|                                            | $\text{R}_3$ | 0.958        | 105.5  | 0.956 | 0.957 | 0.957              |       |
|                                            | $\theta_1$   | 104.0        | 54.0   | 104.5 | 104.4 | 104.2              |       |

<sup>a</sup> Optimized geometry calculated at the QCISD/6-311++G(3df,3pd) level.

Table S1 (continue).

|                                    |                | QCISD <sup>a</sup> | Ref.10 |
|------------------------------------|----------------|--------------------|--------|
| Cu <sup>+</sup> (H <sub>2</sub> O) | R <sub>1</sub> | 3.508              | 3.257  |
| C <sub>s</sub>                     | R <sub>2</sub> | 0.959              | 0.964  |
|                                    | R <sub>3</sub> | 0.968              | 0.986  |
|                                    | θ <sub>1</sub> | 100.1              | 99.0   |
|                                    | θ <sub>2</sub> | 74.4               |        |
|                                    |                |                    |        |
| Cu(H <sub>2</sub> O)(I)            | R <sub>1</sub> | 2.158              | 2.068  |
| C <sub>s</sub>                     | R <sub>2</sub> | 0.961              | 0.966  |
|                                    | θ <sub>1</sub> | 105.3              | 105.3  |
|                                    | φ              | 43.2               |        |
|                                    |                |                    |        |
| Cu(H <sub>2</sub> O)(II)           | R <sub>1</sub> | 3.908              | 3.520  |
|                                    | R <sub>2</sub> | 0.959              | 0.965  |
|                                    | R <sub>3</sub> | 0.957              | 0.962  |
|                                    | θ <sub>1</sub> | 104.2              | 103.9  |

<sup>a</sup> Optimized geometry calculated at the QCISD/6-311++G(3df,3pd) level.



**Table 2.** Harmonic vibrational frequencies of  $\text{Cu}^+(\text{H}_2\text{O})$  and  $\text{CuH}_2\text{O}$  calculated at the MP2/6-311++G(2d,2p) level of theory. Zero point energies (ZPEs) are given in kcal/mol.

| mode                      | $\text{Cu}^+(\text{H}_2\text{O})$ | $\text{Cu}(\text{H}_2\text{O})(\text{I})$ | $\text{Cu}(\text{H}_2\text{O})(\text{II})$ |
|---------------------------|-----------------------------------|-------------------------------------------|--------------------------------------------|
| O-H asym                  | 3874 (a')                         | 3917 (a'')                                | 3964 (a')                                  |
| O-H sym                   | 3601 (a')                         | 3794 (a')                                 | 3841 (a')                                  |
| H-O-H sci                 | 1670 (a')                         | 1649 (a')                                 | 1660 (a')                                  |
| $\text{H}_2\text{O}$ bend | 538 (a'')                         | 392 (a'')                                 | 102 (a'')                                  |
| Cu-OH <sub>2</sub> str    | 169 (a')                          | 337 (a')                                  | 61 (a')                                    |
| $\text{H}_2\text{Orot}$   | 96 (a')                           | 157 (a')                                  | 33 (a')                                    |
| ZPE                       | 14.22                             | 14.65                                     | 13.81                                      |

Vibrational frequencies of  $\text{H}_2\text{O}$  are calculated to be 3986, 3865, and 1660  $\text{cm}^{-1}$ , and ZPE of  $\text{H}_2\text{O}$  is 13.60 kcal/mol at the MP2/6-311++G(2d,2p) level.
